## **Lipopolysaccharide-binding protein (LBP) can reverse the amyloid state of fibrin seen or induced in Parkinson's disease: implications for its aetiology**

**<sup>1</sup>Etheresia Pretorius, <sup>2</sup>Sthembile Mbotwe, <sup>3,4,5\*</sup>Douglas B. Kell**

<sup>1</sup>Department of Physiological Sciences, Stellenbosch University, 7602, South Africa.

<sup>2</sup>Department of Physiology, Faculty of Health Sciences, University of Pretoria, Arcadia 0007, South Africa.

<sup>3</sup>School of Chemistry, <sup>4</sup>The Manchester Institute of Biotechnology, and <sup>5</sup>Centre for Synthetic Biology of Fine and Speciality Chemicals, The University of Manchester, 131 Princess St, MANCHESTER M1 7DN, Lancs, UK

**\*Corresponding authors:**

| <b>*Etheresia Pretorius</b>                                                                                                                                    | <b>*Douglas B. Kell</b>                                                                                                                                                                                       |
|----------------------------------------------------------------------------------------------------------------------------------------------------------------|---------------------------------------------------------------------------------------------------------------------------------------------------------------------------------------------------------------|
| Department of Physiological Sciences,<br>Stellenbosch University, Private Bag X1<br>MATIELAND, 7602<br>SOUTH AFRICA<br>resiap@sun.ac.za<br>Tel: (+27)829295041 | School of Chemistry and The<br>Manchester Institute of Biotechnology,<br>The University of Manchester, 131,<br>Princess St, MANCHESTER M1 7DN,<br>Lancs, UK<br>dbk@manchester.ac.uk<br>Tel: (+44)161 306 4492 |

## Abstract

The thrombin-induced polymerisation of fibrinogen to form fibrin is well established as a late stage of blood clotting. In recent work, we showed that the presence of tiny amounts of bacterial lipopolysaccharide (LPS) could cause these clots to adopt an amyloid form, that could be observed via scanning electron microscopy (SEM) or via the fluorescence of thioflavin-T. This could be prevented by the prior addition of lipopolysaccharide-binding protein (LBP). We had also observed by SEM this unusual clotting in the blood of patients with Parkinson's disease (PD). We here show that this too can be prevented by LBP, thereby implicating such inflammatory microbial cell wall products in the aetiology of the disease. This may lead to novel treatment strategies in PD designed to target microbes and their products.

## Keywords

Thrombin; fibrin(ogen) clotting; LPS; LBP; thioflavin-T

## Introduction

It is widely recognised that that many chronic, inflammatory diseases are accompanied by insoluble amyloid fibril formation (Chiti and Dobson, 2006; Herczenik and Gebbink, 2008; Rambaran and Serpell, 2008; Eisenberg and Jucker, 2012; Knowles et al., 2014; Tipping et al., 2015; Riek and Eisenberg, 2016). Thus, Parkinson's (PD) is accompanied by amyloid forms of  $\alpha$ -synuclein in the substantia nigra pars compacta (Uversky et al., 2001; Vilar et al., 2008; Olanow and Brundin, 2013; Kalia and Kalia, 2015; Kalia and Lang, 2015; Sampson et al., 2016). To this end, systems biology approaches (Antony et al., 2013; Funke et al., 2013; Jones et al., 2013; Fujita et al., 2014; Krishna et al., 2014) have made considerable headway in accounting for the known "Parkinson's" genes in biochemical terms, with the additional recognition that iron dysregulation is also a major contributor to disease progression (Double et al., 2000; Levenson, 2003; Jones et al., 2007; Barnham and Bush, 2008; Gerlach et al., 2008; Perez et al., 2008; Altamura and Muckenthaler, 2009; Kell, 2009; Kell, 2010; Jameson, 2011; Oshiro et al., 2011; Weinreb et al., 2013; Kell and Pretorius, 2014).

It is rather less widely recognised that PD is also accompanied by major changes in the normal clotting of blood, i.e. it is a coagulopathy (Sato et al., 2003; Rosenbaum et al., 2013; Pretorius et al., 2014c; Infante et al., 2016).

When thrombin is added to the platelet poor plasma (PPP) of healthy controls, the fibres forming the subsequent clot appear like a plate of noodles or spaghetti in the scanning electron microscope (Campbell et al., 2010; Pretorius et al., 2011b; Weigandt et al., 2012; Bester et al., 2015; Kell and Pretorius, 2015b). However, we and others have observed that their diameter and morphology changes markedly in a variety of vascular and inflammatory diseases, typically producing 'dense matter deposits' (e.g. (Jörneskog et al., 1996; Dunn and Ariëns, 2004; Dunn et al., 2005; Dunn et al., 2006; Pieters et al., 2006; Alzahrani and Ajan, 2010; Pretorius et al., 2011a; Pretorius et al., 2011b; Alzahrani et al., 2012; Pretorius and Kell, 2014; Pretorius et al., 2015)).

Thrombin removes two fibrinopeptides from fibrinogen, thereby allowing the fibrinogen to self-assemble into insoluble fibrin via a 'knobs and holes' mechanism (e.g. (Weisel, 2005; Wolberg, 2007; Cilia La Corte et al., 2011; Undas and Ariëns, 2011; Wolberg, 2012)). There are not otherwise considered to be any major changes in secondary structure (Weisel, 2005; Averett et al., 2008; Yermolenko et al., 2011; Protopopova et al., 2015). A final crosslinking step catalysed by Factor XIII (after it too has been activated by thrombin) (Dickneite et al., 2015) increases the stability of the clot.

A very specific feature of amyloid proteins is the formation of a cross- $\beta$ -sheet structure, perpendicular to the fibres with a characteristic spacing (observable in X-ray reflections) of 4.7-4.8Å (e.g. (Maji et al., 2009; Eisenberg and Jucker, 2012; Tycko and Wickner, 2013; Riek and

Eisenberg, 2016)). In contrast to normal structures, thioflavin T binds strongly to them, and fluoresces strongly at 480-520nm when excited at ~440 nm (e.g. (LeVine, 1999;Biancalana et al., 2009;Biancalana and Koide, 2010;Groenning, 2010;Sulatskaya et al., 2011;Freire et al., 2014)).

Although it can become so in the presence of a rare mutation in the fibrinogen a chain (Serpell et al., 2007;Picken, 2010;Stangou et al., 2010;Haidinger et al., 2013)), or by extreme mechanical stretching (Zhmurov et al., 2011;Litvinov et al., 2012;Zhmurov et al., 2012), fibrinogen is not considered to be amyloidogenic, nor is fibrin seen as an amyloid protein. However, following many observations in the SEM of anomalous blood clotting (e.g. (Pretorius et al., 2013b;Kell and Pretorius, 2014;Pretorius et al., 2014a;Pretorius and Kell, 2014;Bester et al., 2015;Kell and Pretorius, 2015b;Pretorius et al., 2015;Pretorius et al., 2016d)), we have recently established (Kell and Pretorius, 2016b;a;Pretorius et al., 2016c;Pretorius et al., 2016d) that this anomalous clotting is in fact amyloid in nature.

Dormant bacteria are widespread in nature (Kaprelyants et al., 1993;Domingue and Woody, 1997;Kell et al., 1998;Mattman, 2001;Domingue, 2010), and we have argued strongly for a role for dormant bacteria in the aetiology of such diseases (Kell et al., 2015;Kell and Pretorius, 2015a;Potgieter et al., 2015;Iltzhaki et al., 2016;Kell and Kenny, 2016b;Kell and Pretorius, 2016c;Pretorius et al., 2016a;Pretorius et al., 2016b). In the recent analysis, amyloid formation occurred in the presence of tiny amounts of bacterial LPS, but was abolished when this was added together with a two-fold stoichiometric excess of human LBP (lipopolysaccharide binding protein) (Pretorius et al., 2016d). Recent work in mice lends strong support to the view that the gut microbiome can play a major role in the aetiology of PD (Sampson et al., 2016).

Iron is also capable of catalysing anomalous blood clotting (Pretorius et al., 2013b;Pretorius et al., 2014a), and there are strong indications for both iron dysregulation (Double et al., 2000;Kaur et al., 2003;Valko et al., 2005;Berg et al., 2008;Kell, 2008;Kell, 2010;Friedman and Galazka-Friedman, 2012;Funke et al., 2013;Hare et al., 2014;Kell and Pretorius, 2014;McDowall and Brown, 2016) and coagulopathies (Pretorius and Kell, 2014) in Parkinson's disease. The purpose of the present paper was thus to study whether (the extent of) fibrin-type amyloid in blood varies between suitably matched controls and individuals with Parkinson's disease. In addition, we wished to know whether the removal of any LPS using LBP affected this in any way. It became clear that the answers are in the affirmative in both cases.

## Materials and Methods

### Ethical statement

Ethical clearance was obtained from the Health Sciences Ethical Committee of the University of Pretoria and informed consent was obtained from each of the patients, as well as from controls (ethical number: 80/2013 and reapproved 2015). Exclusion criteria for the PD were conditions such as asthma, human immunodeficiency virus (HIV) or tuberculosis, and risk factors associated with metabolic syndrome, smoking, and (if female) being on contraceptive or hormone replacement treatment. Exclusion criteria for the healthy population were known inflammatory conditions such as asthma, human immunodeficiency virus (HIV) or tuberculosis, and risk factors associated with metabolic syndrome, smoking, and if female, being on contraceptive or hormone replacement treatment. This population did not take any anti-inflammatory medication. Whole blood of all participants was obtained in citrate tubes and platelet poor plasma (PPP) was used for confocal and SEM experiments. The methods were carried out in accordance with the approved guidelines. Blood was collected and methods were carried out in accordance with the relevant guidelines of the ethics committee. We adhered strictly to the Declaration of Helsinki.

### Sample population

In this study, 10 healthy, age-controlled individuals of whom 9 were spouses of some of the Parkinson's disease (PD) individuals, and 26 individuals diagnosed with PD, were included. We also statistically compared results of healthy individuals from a previous study with Exclusion criteria for the healthy population were known inflammatory conditions such as asthma, human immunodeficiency virus (HIV) or tuberculosis, and risk factors associated with metabolic syndrome, smoking, and if female, being on contraceptive or hormone replacement treatment. The PD patients were diagnosed by a Neurologist and the Unified Parkinson's Disease Rating Scale (UPDRS) was used in this diagnoses. On the day of blood collection, the Hoehn and Yahr scale was used by a clinician to rate the relative level of the PD disability (see Table 1 for the stages). Margaret M. Hoehn and Melvin D Yahr developed the Hoehn and Yahr scale to scale practically the severity of PD at the time of treatment, and thereby determine whether the medication or treatment that is used influences the rate of the progression of the disease (Hoehn and Yahr, 1967). Many studies thereafter have used this method in scaling the severity of movement disorders (Stocchi et al., 1997; Karlsen et al., 2000; Schrag et al., 2000a;b; Rodríguez-Violante et al., 2015).

**Table 1:** Relative level of disability and stage of Parkinson's disease the Hoehn and Yahr scale.

| Stage   | Symptoms            |
|---------|---------------------|
| Stage 0 | No signs of disease |

|           |                                                                                                                                                                         |
|-----------|-------------------------------------------------------------------------------------------------------------------------------------------------------------------------|
| Stage 1   | Symptoms on one side only (unilateral)                                                                                                                                  |
| Stage 1.5 | Symptoms unilateral and also involving the neck and spine                                                                                                               |
| Stage 2   | Symptoms on both sides (bilateral) but no impairment of balance                                                                                                         |
| Stage 2.5 | Mild bilateral symptoms with recovery when the 'pull' test is given (the doctor stands behind the person and asks them to maintain their balance when pulled backwards) |
| Stage 3   | Balance impairment. Mild to moderate disease. Physically independent                                                                                                    |
| Stage 4   | Severe disability, but still able to walk or stand unassisted                                                                                                           |
| Stage 5   | Needing a wheelchair or bedridden unless assisted                                                                                                                       |

### **LPS-binding protein**

A final LPS-binding protein (LBP) exposure concentration of  $2 \text{ ng.L}^{-1}$  LBP was used.

### **Airyscan and scanning electron microscopy**

PPP was prepared from whole blood collected in citrated tubes, from both healthy and PD individuals. For Airyscan preparation, we added Thioflavin T (ThT) at a final concentration of  $5 \mu\text{M}$  to  $200 \mu\text{L}$  of various prepared PPP samples and incubated it (protected from light) for one minute. This step was followed with the addition of thrombin, added in the ratio 1:2 to create extensive fibrin networks. A coverslip was placed over the prepared clot, and viewed immediately with a Zeiss LSM 510 META confocal microscope with a Plan-Apochromat 163 and  $100\times/1.4$  Oil DIC objective. Excitation was at 488 nm and emitted light was measured at 505-550 nm. In addition, PPP from PD individuals were incubated with PBP (final concentration  $2 \text{ ng.L}^{-1}$ ) for 10 minutes, followed by ThT and clot preparation as for the healthy and naïve PD PPP. Clots were also prepared for SEM analysis, but after addition of thrombin, clots were washed, fixed in 4% formaldehyde and prepared for SEM according to known SEM preparation methods. Samples were viewed using a Zeiss cross beam electron microscope was used to study fibrin fibres.

### **Statistical analysis**

The non-parametric Mann–Whitney U test (between controls and PD samples) and the parametric T-test was performed (within samples) using the STATSDIRECT software.

## Results

Table 2 shows demographics for the healthy and the PD groups. The median of the Hoehn and Yahr scale for the PD individuals were 2.5 ( $\pm 0.43$ ); suggesting that mostly, individuals participating in this study had mild bilateral PD symptoms at date of blood collection. Airyscan results are shown in Figures 1 to 4, for the healthy and PD individuals.

**Table 2:** Demographics for the healthy and the PD individuals.

| HEALTHY INDIVIDUALS (n=10)                                                         |              |                                                                     |
|------------------------------------------------------------------------------------|--------------|---------------------------------------------------------------------|
|                                                                                    | Gender       | Age                                                                 |
| Median; STD; %                                                                     | 70% F; 30% M | All: 67.5 ( $\pm 3$ )<br>M: 67 ( $\pm 2.5$ )<br>F: 68 ( $\pm 2.9$ ) |
| PARKINSON'S DISEASE INDIVIDUALS (Hoehn and Yahr scale 2.5 ( $\pm 0.43$ )) (n = 26) |              |                                                                     |
| Median; STD; %                                                                     | 35% F; 65% M | All: 70 ( $\pm 3.5$ )<br>M: 70 ( $\pm 3.9$ )<br>F: 71 ( $\pm 3.9$ ) |

### Scanning electron microscopy of PPP clots

Figure 1 shows how fibrin clots created from healthy PPP, looks like under a 10 000x machine magnification. Fibers have a spaghetti-like appearance, where individual fibres are visible. Fibrin clots created from PPP of PD individuals, all have a typical matted appearance, where individual fibres are entwined into a matted mass (see Figure 2), indicative of hypercoagulation. We recently suggested that this changed fibrin protein structure in inflammatory conditions like T2D, rheumatoid arthritis and others, are due to  $\beta$ -sheet-rich areas forming in the presence of both upregulated inflammatory markers, and particularly the presence of LPS (Pretorius et al., 2016d). We also showed that LPS added to healthy PPP created clots that showed hypercoagulation, and that the addition of LBP could reverse this pathological fibrin structure (Pretorius et al., 2016d). As referred to in the introduction, we also showed that the pathological fibrin structure of T2D could be reversed with the addition of LBP. Therefore, we suggested that LBP protects the fibres from LPS damage by binding to LPS and therefore that LBP could decrease  $\beta$ -sheet-rich areas in T2D plasma.

Here we also added LBP to PPP from PD individuals. We could show that in all our PD samples, a structural revert to that similar to clots created from healthy PPP, could be obtained. All raw data, including extensive SOPs for SEM are stored on [https://1drv.ms/f/s!AgoCOmY3bkKHmWY8VijKiQ-8\\_5RY](https://1drv.ms/f/s!AgoCOmY3bkKHmWY8VijKiQ-8_5RY) and on EP's researchgate profile, [https://www.researchgate.net/profile/Etheresia\\_Pretorius](https://www.researchgate.net/profile/Etheresia_Pretorius).

### Airyscan super-resolution microscopy of clots created from PPP

Previously we have noted that in healthy PPP, in the presence of ThT, little to no fluorescence was present, with only occasional very small patches of fluorescence (Pretorius et al., 2016d)(Kell and Pretorius, 2016a). We have also shown that when LPS had been added to healthy PPP, prior to thrombin, fluorescence was greatly enhanced, suggesting increased binding of ThT to  $\beta$ -sheet-rich areas on the fibrin(ogen) (Pretorius et al., 2016d)(Kell and Pretorius, 2016a) From these results, we concluded that LPS binding causes the fibrinogen to polymerise into a form with a greatly increased amount of  $\beta$ -sheet (in the presence of thrombin), reflecting amyloid formation. This causes a strong fluorescence observable (when excited ca 440 nm) in the presence of ThT (see e.g. (Biancalana et al., 2009;Biancalana and Koide, 2010)). In this paper, we also show  $\beta$ -sheet-rich areas in clots created from PPP of PD individuals (Figure 2).

Both Airyscan and SEM techniques are typically used only as qualitative methods. However, due to the increase fluorescence in clots prepared from PPP of PD, and also the more uniform and matted clot structure shown in SEM analysis of clots prepared from PD PPP, the variance between light and dark pixels are much less than seen in clots prepared from healthy PPP. We therefore propose using the coefficient of variation (CV) as our metric to quantify and discriminate between clots from healthy PPP and clots from PD PPP. We used ImageJ to calculate the mean and standard deviation of the intensity of the pixels in the images of the clot, using the histogram function, followed by the calculation of the coefficient of variation (i.e. SD/mean) of the intensity of the clot structure. Figure 3 shows boxplots of our SEM results and Figure 4A to D show examples of representative histograms of the 8-bit intensity for a typical SEM and confocal clot with and without LBP of a patient with PD. Within-sample analysis was done with the paired T-test and between-samples analysis was done using the Mann-Whitney test (See Table 3). We did not in this paper repeat Airyscan analysis with clots created with healthy PPP

**Table 3:** Data for Parkinson’s disease and healthy individuals showing the coefficients of variation (CV) of the intensity of the pixels in the clot images.

| DATA FOR SCANNING ELECTRON MICROSCOPY                     |                    |                                                          |                                |
|-----------------------------------------------------------|--------------------|----------------------------------------------------------|--------------------------------|
| PARKINSON’S DISEASE DATA<br>Coefficient of variation (CV) |                    | HEALTHY INDIVIDUAL DATA<br>Coefficient of variation (CV) |                                |
|                                                           | Naïve PD           | PD treated with LBP                                      | Control no Naïve controls      |
| <b>MEDIAN AND SD</b>                                      | 0.53 ( $\pm$ 0.14) | 0.63 ( $\pm$ 0.14)                                       | 0.59 ( $\pm$ 0.10)             |
| DATA FOR AIRYSCAN                                         |                    |                                                          |                                |
|                                                           | Naïve PD           | PD treated with LBP                                      |                                |
| <b>MEDIAN AND SD</b>                                      | 0.17 ( $\pm$ 0.10) | 0.06 ( $\pm$ 0.03)                                       |                                |
| SCANNING ELECTRON MICROSCOPY                              |                    |                                                          |                                |
| CHOICE OF SAMPLES                                         | TEST USED          |                                                          | P-VALUE                        |
| Analysis between naïve PD and naïve controls              | Mann-Whitney       |                                                          | <i>Two sided P &lt; 0.0001</i> |



| Analysis between naïve PD and PD treated with LBP       | Paired T-test    | <b><i>Two sided P &lt; 0.0001</i></b> |
|---------------------------------------------------------|------------------|---------------------------------------|
| Analysis between PD treated with LBP and naïve controls | Mann-Whitney     | Two-sided P = 0.67                    |
| <b>AIRYSCAN TECHNOLOGY</b>                              |                  |                                       |
| <b>CHOICE OF SAMPLES</b>                                | <b>TEST USED</b> | <b>P-VALUE</b>                        |
| Analysis between naïve PD and PD treated with LBP       | Paired T-test    | <b><i>Two sided P &lt; 0.0001</i></b> |

## Discussion

Although we have observed anomalies in the kinds of fibrin fibres produced in the plasma of patients with various inflammatory diseases (e.g. (Pretorius et al., 2011b; Pretorius et al., 2011c; Pretorius et al., 2012; Pretorius et al., 2013b; Pretorius et al., 2014a; Pretorius et al., 2014b; Kell and Pretorius, 2015b; Pretorius et al., 2015; Kell and Pretorius, 2016a)), this is the first time that we have observed fibrin amyloid in Parkinson's Disease, as assessed by thioflavin T staining and its sensitivity (and that of fibres observed in the SEM) to LBP. While fibrin and  $\alpha$ -synuclein can coaggregate (Bhattacharjee and Bhattacharyya, 2014), it is especially notable that the thrombin-dependence and SEM fibre sizes tell us that the fibres we observe imply that they are essentially all made of fibrin.

Although  $\alpha$ -synuclein fibre formation in the substantia nigra is characteristic of PD, it can also occur extracellularly, and its removal may be of therapeutic benefit (Kim et al., 2012; Park and Kim, 2013). The production may be driven by intestinal LPS (Kelly et al., 2014), while gut microbiota-derived short-chain fatty acids may also have a role (Sampson et al., 2016).

In terms of treatment (Kakkar and Dahiya, 2015; Kalia et al., 2015), we have previously discussed the potential role of iron chelators, both to stop the Fenton reaction (Kell, 2009) (Kell, 2010) and to inhibit microbial proliferation (e.g. (Kell et al., 2015; Kell and Pretorius, 2015a; Potgieter et al., 2015; Kell and Kenny, 2016a)), and iron chelators can definitely also inhibit the formation of dense matted deposits (e.g. (Kell and Pretorius, 2014) (Pretorius et al., 2013a; Nielsen and Pretorius, 2014; Pretorius et al., 2014a; Pretorius and Kell, 2014; Kell and Pretorius, 2015b)). It is now clear that treatment options worth exploring also include anticoagulants; as yet, however, the evidence for any effect of heparin is awaited, due to RCTs not having been done (Li et al., 2010)

## Concluding remarks

Overall, the remarkable reversal of amyloid fibrin formation by LBP addition to the plasma of Parkinson's disease patients implies strongly that LPS is naturally pre-existing in said plasma. Although almost all the LPS is bound to plasma proteins under normal conditions (Kell and Pretorius, 2015a), including presumably to fibrinogen, but in concentrations that are consequently hard to determine (Kell and Pretorius, 2015a), it is known from the effects of adding them exogenously that LBP molecules can inhibit the LPS-induced formation of the amyloid form of fibrin

when thrombin is present (Pretorius et al., 2016d). Consequently, the present work lends strong support to the idea (and evidence (Gabielli et al., 2011; Tlaskalová-Hogenová et al., 2011)) that a dormant blood and tissue microbiome is at least part of the aetiology of Parkinson's disease.

## Acknowledgements

We thank the Biotechnology and Biological Sciences Research Council (grant BB/L025752/1) as well as the National Research Foundation (NRF) of South Africa (91548: Competitive Program) and the Medical Research Council of South Africa (MRC) (Self-Initiated Research Program: A0X331 for supporting this collaboration. The authors thank Dr Prashilla Soma: Clinician. Some reagent funds were supplied as a philanthropic gift by an anonymous donor.

## Disclosure

The authors (EP, SM, DBK) do not have any conflict of interest to declare.

## Author contribution statement

EP is the study leader, analysed all samples, prepared all figures, co-wrote paper; SM: technical assistance with SEM preparation; DBK is the study co-leader, and co-wrote and edited the paper. All authors reviewed the manuscript.

## TABLE AND FIGURE LEGENDS

**Figure 1: A and B)** Clot structure from two healthy individuals. All clots were created by adding thrombin to PPP.

**Figure 2: A ):** Airyscan micrographs of PPP with added thrombin to form extensive fibrin fibres from an individuals with Parkinson's disease (PD); **B)** PPP from the same individual, but exposed to  $2\text{ng.L}^{-1}$  LPS-binding protein followed by addition of thrombin. Thioflavin T (ThT) ( $5\ \mu\text{M}$ ) was added before thrombin. Micrographs were taken with a Zeiss LSM 510 META confocal microscope with a Plan-Apochromat 63x/1.4 Oil DIC objective. ***LBP dramatically reduced the fluorescence seen in samples from patients with PD.*** Gain settings were kept the same during all data capturing and not changed for statistical analysis, but brightness and contrast was slightly adjusted for figure preparation. **C)** SEM micrographs of PPP with added thrombin from the same individuals; **D)** PPP from same individual, but exposed to  $2\text{ng.L}^{-1}$  LPS-binding protein followed by addition of thrombin.

**Figure 3:** Boxplots of the distribution of the coefficients of variation in the pixel intensities of the SEM clot images from the different sample classes analysed (median coefficients of variation for each group is in box above plots).

**Figure 4: A and B)** Representative histograms of the 8-bit intensity for a typical SEM clot from PPP of an individual with Parkinson's disease and after addition of LBP. **C and D)** Representative histograms of the 8-bit intensity for a typical Airyscan clot from PPP of an individual with Parkinson's disease and after addition of LBP.

**Table 1:** Relative level of disability and stage of Parkinson's disease the Hoehn and Yahr scale.

**Table 2:** Demographics for the healthy and the PD individuals.

**Table 3:** Data for Parkinson's disease and healthy individuals showing the coefficients of variation (CV) of the intensity of the pixels in the clot images.

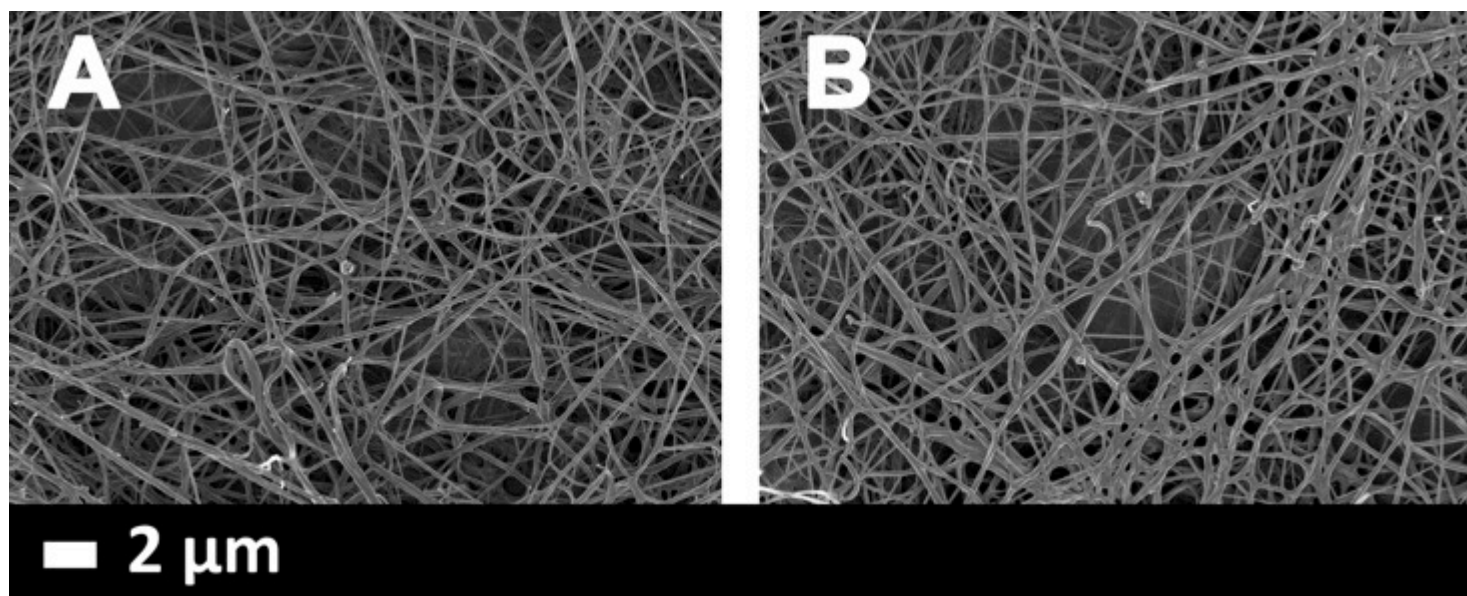

**Figure 1: A and B)** Clot structure from two healthy individuals. All clots were created by adding thrombin to PPP.

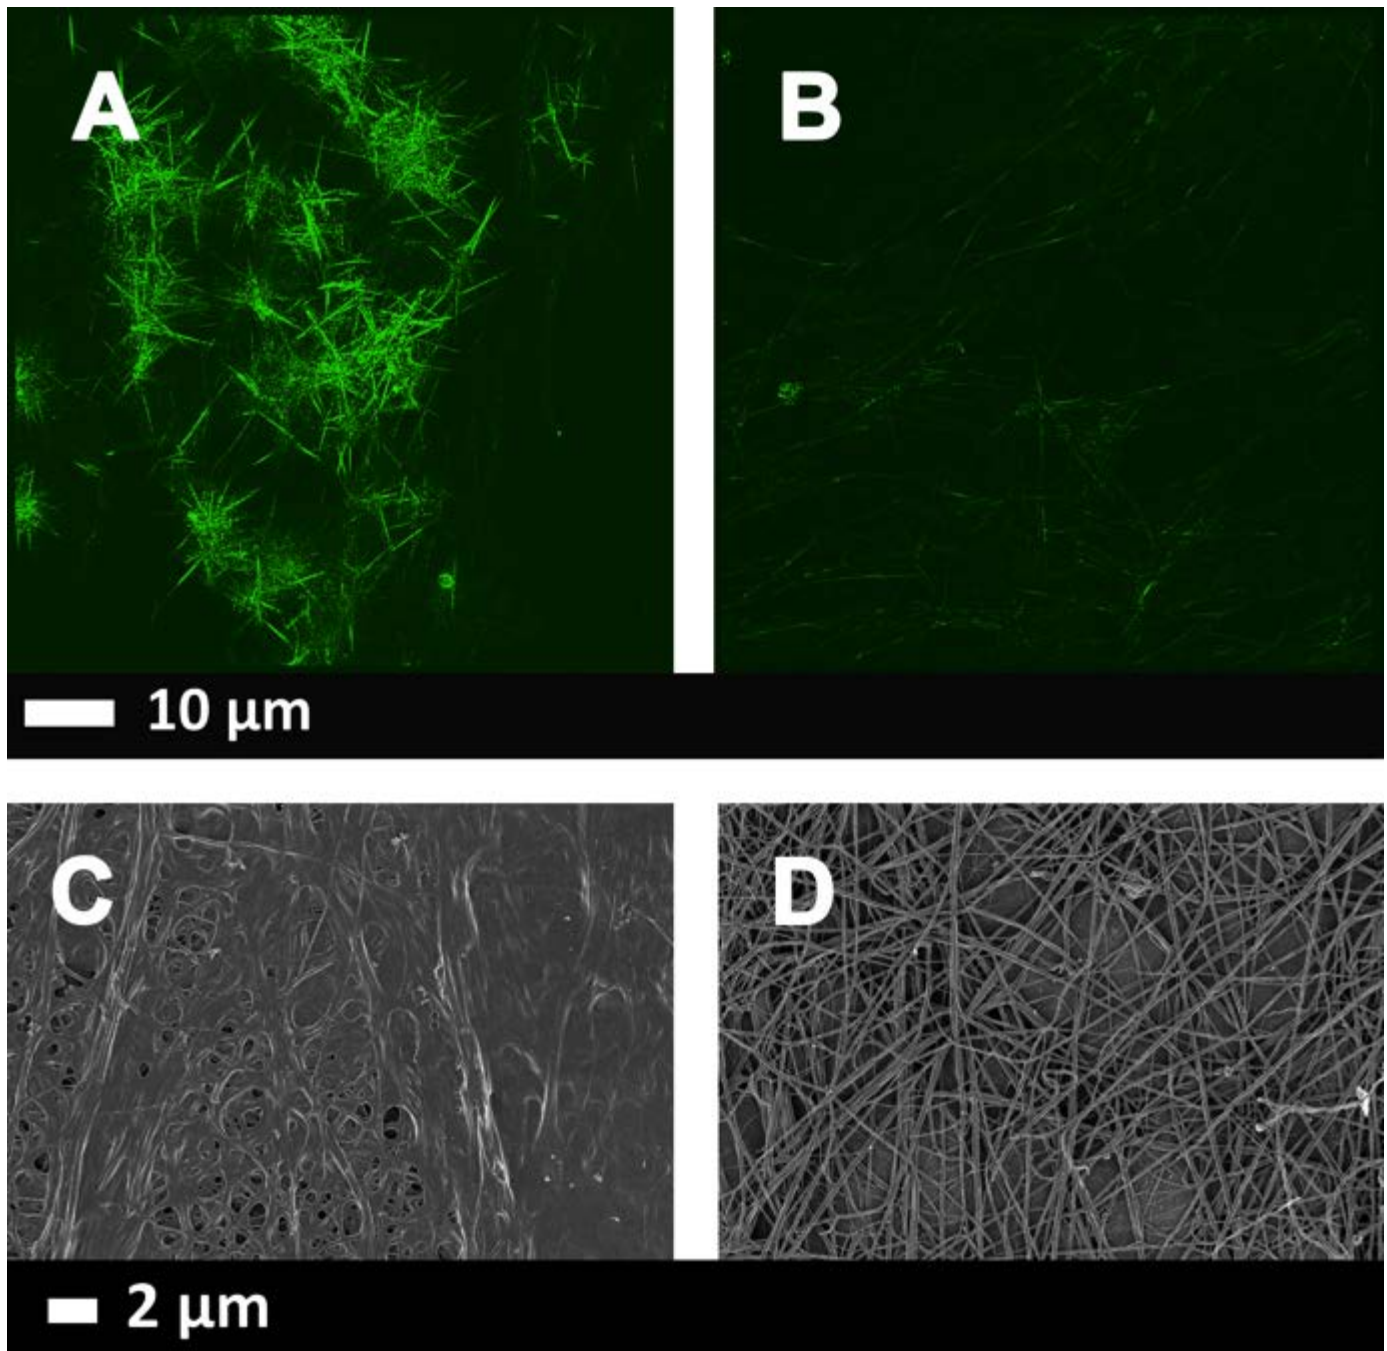

**Figure 2: A ):** Airyscan micrographs of PPP with added thrombin to form extensive fibrin fibres from an individuals with Parkinson's disease (PD); **B)** PPP from the same individual, but exposed to  $2\text{ng.L}^{-1}$  LPS-binding protein followed by addition of thrombin. Thioflavin T (ThT) ( $5\ \mu\text{M}$ ) was added before thrombin. Micrographs were taken with a Zeiss LSM 510 META confocal microscope with a Plan-Apochromat 63x/1.4 Oil DIC objective. **LBP dramatically reduced the fluorescence seen in samples from patients with PD.** Gain settings were kept the same during all data capturing and not changed for statistical analysis, but brightness and contrast was slightly adjusted for figure preparation. **C)** SEM micrographs of PPP with added thrombin from the same individuals; **D)** PPP from same individual, but exposed to  $2\text{ng.L}^{-1}$  LPS-binding protein followed by addition of thrombin.

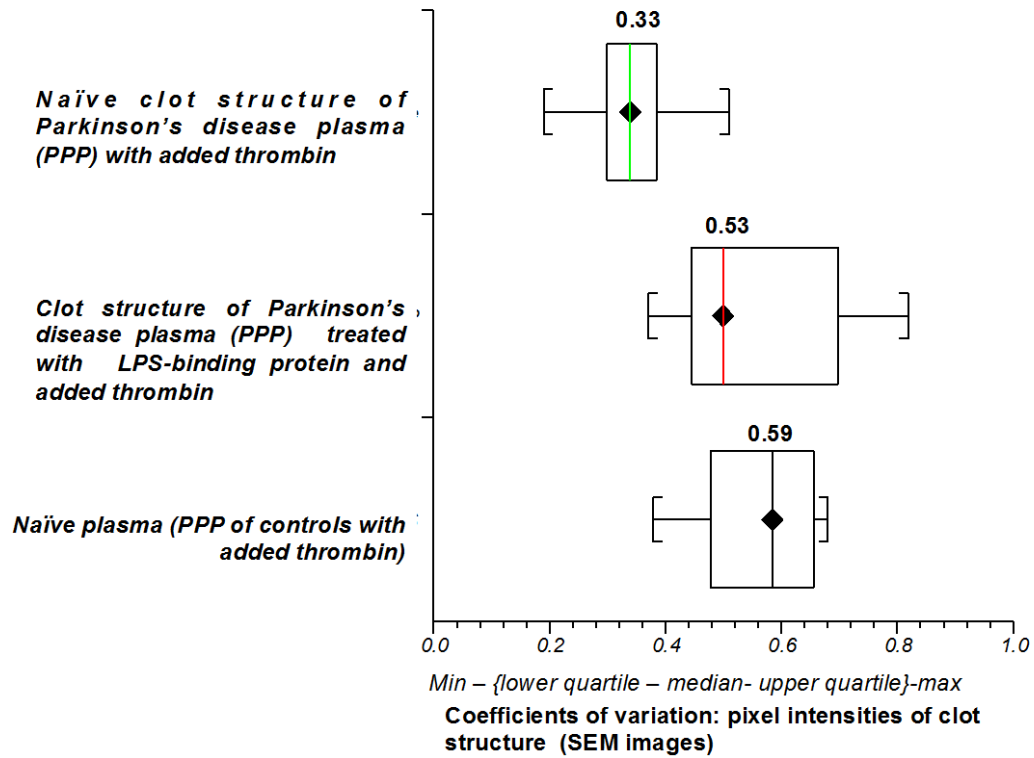

**Figure 3:** Boxplots of the distribution of the coefficients of variation in the pixel intensities of the SEM clot images from the different sample classes analysed (median coefficients of variation for each group is in box above plots).

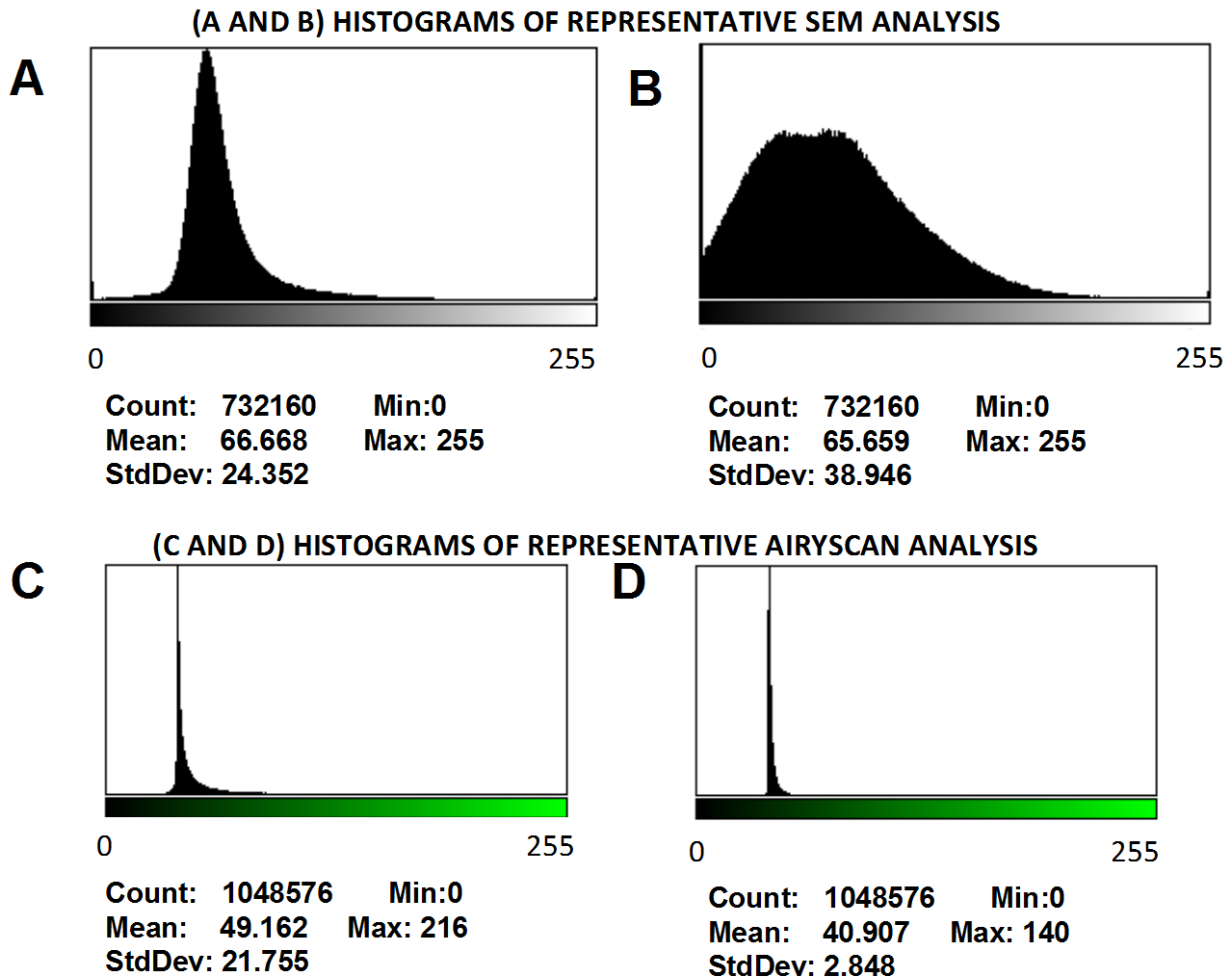

**Figure 4: A and B)** Representative histograms of the 8-bit intensity for a typical SEM plot from PPP of an individual with Parkinson's disease and after addition of LBP. **C and D)** Representative histograms of the 8-bit intensity for a typical Airyscan plot from PPP of an individual with Parkinson's disease and after addition of LBP.

## References

- Altamura, S., and Muckenthaler, M.U. (2009). Iron toxicity in diseases of aging: Alzheimer's disease, Parkinson's disease and atherosclerosis. *J Alzheimers Dis* 16, 879-895.
- Alzahrani, S.H., and Ajjan, R.A. (2010). Coagulation and fibrinolysis in diabetes. *Diabet Vasc Dis Res* 7, 260-273. doi: 10.1177/1479164110383723.
- Alzahrani, S.H., Hess, K., Price, J.F., Strachan, M., Baxter, P.D., Cubbon, R., Phoenix, F., Gamlen, T., Ariëns, R.a.S., Grant, P.J., and Ajjan, R.A. (2012). Gender-specific alterations in fibrin structure function in type 2 diabetes: associations with cardiometabolic and vascular markers. *J Clin Endocrinol Metab* 97, E2282-2287. doi: 10.1210/jc.2012-2128.
- Antony, P.M.A., Diederich, N.J., Krüger, R., and Balling, R. (2013). The hallmarks of Parkinson's disease. *FEBS J* 280, 5981-5993. doi: 10.1111/febs.12335.
- Averett, L.E., Geer, C.B., Fuierer, R.R., Akhremitchev, B.B., Gorkun, O.V., and Schoenfisch, M.H. (2008). Complexity of "A-a" knob-hole fibrin interaction revealed by atomic force spectroscopy. *Langmuir* 24, 4979-4988. doi: 10.1021/la703264x.
- Barnham, K.J., and Bush, A.I. (2008). Metals in Alzheimer's and Parkinson's diseases. *Curr Opin Chem Biol* 12, 222-228.
- Berg, D., Riederer, P., and Gerlach, M. (2008). Contribution of disturbed iron metabolism to the pathogenesis of Parkinson's disease. *Future Med* 3, 447-461.
- Bester, J., Soma, P., Kell, D.B., and Pretorius, E. (2015). Viscoelastic and ultrastructural characteristics of whole blood and plasma in Alzheimer-type dementia, and the possible role of bacterial lipopolysaccharides (LPS). *Oncotarget Gerontology* 6, 35284-35303.
- Bhattacharjee, P., and Bhattacharyya, D. (2014). "An Insight into the Abnormal Fibrin Clots — Its Pathophysiological Roles," in *Fibrinolysis and Thrombolysis*, ed. K. Kolev. InTechOpen), 1-29.
- Biancalana, M., and Koide, S. (2010). Molecular mechanism of Thioflavin-T binding to amyloid fibrils. *Biochim Biophys Acta* 1804, 1405-1412. doi: 10.1016/j.bbapap.2010.04.001.
- Biancalana, M., Makabe, K., Koide, A., and Koide, S. (2009). Molecular mechanism of thioflavin-T binding to the surface of beta-rich peptide self-assemblies. *J Mol Biol* 385, 1052-1063. doi: 10.1016/j.jmb.2008.11.006.
- Campbell, R.A., Aleman, M., Gray, L.D., Falvo, M.R., and Wolberg, A.S. (2010). Flow profoundly influences fibrin network structure: implications for fibrin formation and clot stability in haemostasis. *Thromb Haemost* 104, 1281-1284. doi: 10.1160/TH10-07-0442.
- Chiti, F., and Dobson, C.M. (2006). Protein misfolding, functional amyloid, and human disease. *Annu Rev Biochem* 75, 333-366.
- Cilia La Corte, A.L., Philippou, H., and Ariëns, R.a.S. (2011). Role of fibrin structure in thrombosis and vascular disease. *Adv Protein Chem Struct Biol* 83, 75-127. doi: 10.1016/B978-0-12-381262-9.00003-3.
- Dickneite, G., Herwald, H., Korte, W., Allanore, Y., Denton, C.P., and Matucci Cerinic, M. (2015). Coagulation factor XIII: a multifunctional transglutaminase with clinical potential in a range of conditions. *Thromb Haemost* 113, 686-697. doi: 10.1160/TH14-07-0625.
- Domingue, G.J. (2010). Demystifying pleomorphic forms in persistence and expression of disease: Are they bacteria, and is peptidoglycan the solution? *Discov Med* 10, 234-246.
- Domingue, G.J., and Woody, H.B. (1997). Bacterial persistence and expression of disease. *Clin Microbiol Rev* 10, 320-344.
- Double, K.L., Gerlach, M., Youdim, M.B., and Riederer, P. (2000). Impaired iron homeostasis in Parkinson's disease. *J Neural Transm Suppl*, 37-58.
- Dunn, E.J., and Ariëns, R.a.S. (2004). Fibrinogen and fibrin clot structure in diabetes. *Herz* 29, 470-479. doi: 10.1007/s00059-004-2607-z.
- Dunn, E.J., Ariëns, R.a.S., and Grant, P.J. (2005). The influence of type 2 diabetes on fibrin structure and function. *Diabetologia* 48, 1198-1206. doi: 10.1007/s00125-005-1742-2.
- Dunn, E.J., Philippou, H., Ariëns, R.a.S., and Grant, P.J. (2006). Molecular mechanisms involved in the resistance of fibrin to clot lysis by plasmin in subjects with type 2 diabetes mellitus. *Diabetologia* 49, 1071-1080. doi: 10.1007/s00125-006-0197-4.

- Eisenberg, D., and Jucker, M. (2012). The amyloid state of proteins in human diseases. *Cell* 148, 1188-1203. doi: 10.1016/j.cell.2012.02.022.
- Freire, S., De Araujo, M.H., Al-Soufi, W., and Novo, M. (2014). Photophysical study of Thioflavin T as fluorescence marker of amyloid fibrils. *Dyes and Pigments* 110, 97-105. doi: 10.1016/j.dyepig.2014.05.004.
- Friedman, A., and Galazka-Friedman, J. (2012). The history of the research of iron in parkinsonian substantia nigra. *J Neural Transm* 119, 1507-1510.
- Fujita, K.A., Ostaszewski, M., Matsuoka, Y., Ghosh, S., Glaab, E., Trefois, C., Crespo, I., Perumal, T.M., Jurkowski, W., Antony, P.M., Diederich, N., Buttini, M., Kodama, A., Satagopam, V.P., Eifes, S., Del Sol, A., Schneider, R., Kitano, H., and Baling, R. (2014). Integrating pathways of Parkinson's disease in a molecular interaction map. *Mol Neurobiol* 49, 88-102. doi: 10.1007/s12035-013-8489-4.
- Funke, C., Schneider, S.A., Berg, D., and Kell, D.B. (2013). Genetics and iron in the systems biology of Parkinson's disease and some related disorders. *Neurochem Internat* 62, 637-652.
- Gabrielli, M., Bonazzi, P., Scarpellini, E., Bendia, E., Lauritano, E.C., Fasano, A., Ceravolo, M.G., Capecci, M., Rita Bentivoglio, A., Provinciali, L., Tonali, P.A., and Gasbarrini, A. (2011). Prevalence of small intestinal bacterial overgrowth in Parkinson's disease. *Mov Disord* 26, 889-892. doi: 10.1002/mds.23566.
- Gerlach, M., Riederer, P., and Double, K.L. (2008). Neuromelanin-bound ferric iron as an experimental model of dopaminergic neurodegeneration in Parkinson's disease. *Parkinsonism Relat Disord* 14 Suppl 2, S185-188.
- Groenning, M. (2010). Binding mode of Thioflavin T and other molecular probes in the context of amyloid fibrils-current status. *J Chem Biol* 3, 1-18. doi: 10.1007/s12154-009-0027-5.
- Haidinger, M., Werzowa, J., Kain, R., Antlanger, M., Hecking, M., Pfaffenberger, S., Mascherbauer, J., Gremmel, T., Gilbertson, J.A., Rowczenio, D., Weichhart, T., Kopecky, C., Hörl, W.H., Hawkins, P.N., and Säemann, M.D. (2013). Hereditary amyloidosis caused by R554L fibrinogen Aalpha-chain mutation in a Spanish family and review of the literature. *Amyloid* 20, 72-79. doi: 10.3109/13506129.2013.781998.
- Hare, D.J., Lei, P., Ayton, S., Roberts, B.R., Grimm, R., George, J.L., Bishop, D.P., Beavis, A.D., Donovan, S.J., Mccoll, G., Volitakis, I., Masters, C.L., Adlard, P.A., Cherny, R.A., Bush, A.I., Finkelstein, D.I., and Doble, P.A. (2014). An iron-dopamine index predicts risk of parkinsonian neurodegeneration in the substantia nigra pars compacta. *Chem Sci*, DOI: 10.1039/c1033sc53461h.
- Herczenik, E., and Gebbink, M.F.B.G. (2008). Molecular and cellular aspects of protein misfolding and disease. *FASEB J* 22, 2115-2133. doi: 10.1096/fj.07-099671.
- Hoehn, M.M., and Yahr, M.D. (1967). Parkinsonism: onset, progression and mortality. *Neurology* 17, 427-442.
- Infante, J., Prieto, C., Sierra, M., Sánchez-Juan, P., González-Aramburu, I., Sanchez-Quintana, C., Berciano, J., Combarros, O., and Sainz, J. (2016). Comparative blood transcriptome analysis in idiopathic and LRRK2 G2019S-associated Parkinson's disease. *Neurobiol Aging* 38, 214 e211-215. doi: 10.1016/j.neurobiolaging.2015.10.026.
- Itzhaki, R.F., Lathe, R., Balin, B.J., Ball, M.J., Braak, H., Bearer, E.L., Bullido, M.J., Carter, C., Clerici, M., Cosby, S.L., Del Tredici, K., Field, H., Fulop, T., Grassi, C., Griffin, W.S.T., Haas, J., Hudson, A.P., Kamer, A., Kell, D.B., Licastro, F., Letenneur, L., Lövheim, H., Mancuso, R., Miklossy, J., Otth, C., Palamara, A.T., Perry, G., Preston, C., Pretorius, E., Strandberg, T., Tabet, N., Taylor-Robinson, S.D., and Whittum-Hudson, J.A. (2016). Microbes and Alzheimer's Disease. *J Alzheimers Dis* 51, 979-984. doi: 10.3233/JAD-160152.
- Jameson, G.N.L. (2011). Iron, cysteine and Parkinson's disease. *Monatshefte Fur Chemie* 142, 325-329.
- Jones, B.C., Beard, J.L., Gibson, J.N., Unger, E.L., Allen, R.P., Mccarthy, K.A., and Earley, C.J. (2007). Systems genetic analysis of peripheral iron parameters in the mouse. *Am J Physiol Regul Integr Comp Physiol* 293, R116-124.
- Jones, B.C., Miller, D.B., O'callaghan, J.P., Lu, L., Unger, E.L., Alam, G., and Williams, R.W. (2013). Systems analysis of genetic variation in MPTP neurotoxicity in mice. *Neurotoxicology* 37C, 26-34. doi: 10.1016/j.neuro.2013.03.010.



- Jörneskog, G., Egberg, N., Fagrell, B., Fatah, K., Hessel, B., Johnsson, H., Brismar, K., and Blombäck, M. (1996). Altered properties of the fibrin gel structure in patients with IDDM. *Diabetologia* 39, 1519-1523.
- Kakkar, A.K., and Dahiya, N. (2015). Management of Parkinsons disease: Current and future pharmacotherapy. *Eur J Pharmacol* 750, 74-81. doi: 10.1016/j.ejphar.2015.01.030.
- Kalia, L.V., and Kalia, S.K. (2015). alpha-Synuclein and Lewy pathology in Parkinson's disease. *Curr Opin Neurol* 28, 375-381. doi: 10.1097/WCO.0000000000000215.
- Kalia, L.V., Kalia, S.K., and Lang, A.E. (2015). Disease-modifying strategies for Parkinson's disease. *Mov Disord* 30, 1442-1450. doi: 10.1002/mds.26354.
- Kalia, L.V., and Lang, A.E. (2015). Parkinson's disease. *Lancet* 386, 896-912. doi: 10.1016/S0140-6736(14)61393-3.
- Kaprelyants, A.S., Gottschal, J.C., and Kell, D.B. (1993). Dormancy in non-sporulating bacteria. *FEMS Microbiol. Rev.* 10, 271-286.
- Karlsen, K.H., Tandberg, E., Arsland, D., and Larsen, J.P. (2000). Health related quality of life in Parkinson's disease: a prospective longitudinal study. *J Neurol Neurosurg Psychiatry* 69, 584-589.
- Kaur, D., Yantiri, F., Rajagopalan, S., Kumar, J., Mo, J.O., Boonplueang, R., Viswanath, V., Jacobs, R., Yang, L., Beal, M.F., Dimonte, D., Volitaskis, I., Ellerby, L., Cherny, R.A., Bush, A.I., and Andersen, J.K. (2003). Genetic or pharmacological iron chelation prevents MPTP-induced neurotoxicity in vivo: A novel therapy for Parkinson's disease. *Neuron* 37, 899-909.
- Kell, D.B. (2008). Iron behaving badly: inappropriate iron chelation as a major contributor to the aetiology of vascular and other progressive inflammatory and degenerative diseases. <http://arxiv.org/ftp/arxiv/papers/0808/0808.1371.pdf>.
- Kell, D.B. (2009). Iron behaving badly: inappropriate iron chelation as a major contributor to the aetiology of vascular and other progressive inflammatory and degenerative diseases. *BMC Med Genom* 2, 2
- Kell, D.B. (2010). Towards a unifying, systems biology understanding of large-scale cellular death and destruction caused by poorly liganded iron: Parkinson's, Huntington's, Alzheimer's, prions, bactericides, chemical toxicology and others as examples. *Arch Toxicol* 577, 825-889. .
- Kell, D.B., Kaprelyants, A.S., Weichart, D.H., Harwood, C.L., and Barer, M.R. (1998). Viability and activity in readily culturable bacteria: a review and discussion of the practical issues. *Antonie van Leeuwenhoek* 73, 169-187.
- Kell, D.B., and Kenny, L.C. (2016a). A dormant microbial component in the development of pre-eclampsia. *Front Med Obs Gynecol* 3, 60. doi: doi: 10.3389/fmed.2016.00060
- Kell, D.B., and Kenny, L.C. (2016b). A dormant microbial component in the development of pre-eclampsia. BioRxiv preprint. . *bioRxiv*, 057356.
- Kell, D.B., Potgieter, M., and Pretorius, E. (2015). Individuality, phenotypic differentiation, dormancy and 'persistence' in culturable bacterial systems: commonalities shared by environmental, laboratory, and clinical microbiology. *F1000Research* 4, 179. doi: DOI:10.12688/f1000research.6709.1.
- Kell, D.B., and Pretorius, E. (2014). Serum ferritin is an important disease marker, and is mainly a leakage product from damaged cells. *Metallomics* 6, 748-773. doi: DOI: 10.1039/C3MT00347G
- Kell, D.B., and Pretorius, E. (2015a). On the translocation of bacteria and their lipopolysaccharides between blood and peripheral locations in chronic, inflammatory diseases: the central roles of LPS and LPS-induced cell death *Integr Biol* 7, 1339-1377. doi: DOI: 10.1039/C5IB00158G.
- Kell, D.B., and Pretorius, E. (2015b). The simultaneous occurrence of both hypercoagulability and hypofibrinolysis in blood and serum during systemic inflammation, and the roles of iron and fibrin(ogen). *Integr Biol* 7, 24-52. doi: 10.1039/c4ib00173g.
- Kell, D.B., and Pretorius, E. (2016a). Proteins behaving badly. Substoichiometric molecular control and amplification of the initiation and nature of amyloid fibril formation: lessons from and for blood clotting. *Progr Biophys Mol Biol*, online; DOI <http://dx.doi.org/10.1016/j.pbiomolbio.2016.1008.1006>.

- Kell, D.B., and Pretorius, E. (2016b). Substoichiometric molecular control and amplification of the initiation and nature of amyloid fibril formation: lessons from and for blood clotting. bioRxiv preprint. *bioRxiv*, 054734. doi: <http://dx.doi.org/10.1101/054734>.
- Kell, D.B., and Pretorius, E. (2016c). To what extent are the terminal stages of sepsis, septic shock, SIRS, and multiple organ dysfunction syndrome actually driven by a toxic prion/amyloid form of fibrin? bioRxiv preprint. *bioRxiv*, 057851. doi: <http://dx.doi.org/10.1101/057851>.
- Kelly, L.P., Carvey, P.M., Keshavarzian, A., Shannon, K.M., Shaikh, M., Bakay, R.A., and Kordower, J.H. (2014). Progression of intestinal permeability changes and alpha-synuclein expression in a mouse model of Parkinson's disease. *Mov Disord* 29, 999-1009. doi: 10.1002/mds.25736.
- Kim, K.S., Choi, Y.R., Park, J.Y., Lee, J.H., Kim, D.K., Lee, S.J., Paik, S.R., Jou, I., and Park, S.M. (2012). Proteolytic cleavage of extracellular alpha-synuclein by plasmin: implications for Parkinson disease. *J Biol Chem* 287, 24862-24872. doi: 10.1074/jbc.M112.348128.
- Knowles, T.P.J., Vendruscolo, M., and Dobson, C.M. (2014). The amyloid state and its association with protein misfolding diseases. *Nat Rev Mol Cell Biol* 15, 384-396. doi: 10.1038/nrm3810.
- Krishna, A., Biryukov, M., Trefois, C., Antony, P.M., Hussong, R., Lin, J., Heinaniemi, M., Glusman, G., Koglsberger, S., Boyd, O., Van Den Berg, B.H., Linke, D., Huang, D., Wang, K., Hood, L., Tholey, A., Schneider, R., Galas, D.J., Balling, R., and May, P. (2014). Systems genomics evaluation of the SH-SY5Y neuroblastoma cell line as a model for Parkinson's disease. *BMC Genomics* 15, 1154. doi: 10.1186/1471-2164-15-1154.
- Levenson, C.W. (2003). Iron and Parkinson's disease: chelators to the rescue? *Nutr Rev* 61, 311-313.
- Levine, H., 3rd (1999). Quantification of beta-sheet amyloid fibril structures with thioflavin T. *Methods Enzymol* 309, 274-284.
- Li, J., Wu, H.M., Zhang, L., Zhu, B., and Dong, B.R. (2010). Heparin and related substances for preventing diabetic kidney disease. *Cochrane Database Syst Rev*, CD005631. doi: 10.1002/14651858.CD005631.pub2.
- Litvinov, R.I., Faizullin, D.A., Zuev, Y.F., and Weisel, J.W. (2012). The alpha-helix to beta-sheet transition in stretched and compressed hydrated fibrin clots. *Biophys J* 103, 1020-1027. doi: 10.1016/j.bpj.2012.07.046.
- Maji, S.K., Wang, L., Greenwald, J., and Riek, R. (2009). Structure-activity relationship of amyloid fibrils. *FEBS Lett* 583, 2610-2617. doi: 10.1016/j.febslet.2009.07.003.
- Mattman, L. (2001). *Cell wall deficient forms: stealth pathogens, 3rd Ed.* Boca Raton: CRC Press.
- Mcdowall, J.S., and Brown, D.R. (2016). Alpha-synuclein: relating metals to structure, function and inhibition. *Metallomics* 8, 385-397. doi: 10.1039/c6mt00026f.
- Nielsen, V.G., and Pretorius, E. (2014). Iron-enhanced coagulation is attenuated by chelation: thrombelastographic and ultrastructural analysis. *Blood Coagul Fibrinolysis* 25, 845-850. doi: 10.1097/MBC.000000000000160.
- Olanow, C.W., and Brundin, P. (2013). Parkinson's disease and alpha synuclein: is Parkinson's disease a prion-like disorder? *Mov Disord* 28, 31-40. doi: 10.1002/mds.25373.
- Oshiro, S., Morioka, M.S., and Kikuchi, M. (2011). Dysregulation of iron metabolism in Alzheimer's disease, Parkinson's disease, and amyotrophic lateral sclerosis. *Adv Pharmacol Sci* 2011, 378278.
- Park, S.M., and Kim, K.S. (2013). Proteolytic clearance of extracellular alpha-synuclein as a new therapeutic approach against Parkinson disease. *Prion* 7, 121-126. doi: 10.4161/pri.22850.
- Perez, C.A., Tong, Y., and Guo, M. (2008). Iron chelators as potential therapeutic agents for Parkinson's disease. *Current Bioactive Compounds* 4, 150-158.
- Picken, M.M. (2010). Fibrinogen amyloidosis: the clot thickens! *Blood* 115, 2985-2986. doi: 10.1182/blood-2009-12-236810.
- Pieters, M., Covic, N., Loots Du, T., Van Der Westhuizen, F.H., Van Zyl, D.G., Rheeder, P., Jerling, J.C., and Weisel, J.W. (2006). The effect of glycaemic control on fibrin network structure of type 2 diabetic subjects. *Thromb Haemost* 96, 623-629.
- Potgieter, M., Bester, J., Kell, D.B., and Pretorius, E. (2015). The dormant blood microbiome in chronic, inflammatory diseases. *FEMS Microbiol Rev* 39, 567-591. doi: <http://dx.doi.org/10.1093/femsre/fuv013>.

- Pretorius, E., Akeredolu, O.-O., Soma, P., and Kell, D.B. (2016a). Major involvement of bacterial components in rheumatoid arthritis and its accompanying oxidative stress, systemic inflammation and hypercoagulability. *Exp Biol Med*, in press.
- Pretorius, E., Bester, J., and Kell, D.B. (2016b). A bacterial component to Alzheimer-type dementia seen via a systems biology approach that links iron dysregulation and inflammagen shedding to disease *J Alzheimers Dis* 53, 1237-1256.
- Pretorius, E., Bester, J., Vermeulen, N., Alummoottil, S., Soma, P., Buys, A.V., and Kell, D.B. (2015). Poorly controlled type 2 diabetes is accompanied by significant morphological and ultrastructural changes in both erythrocytes and in thrombin-generated fibrin: implications for diagnostics. *Cardiovasc Diabetol* 13, 30.
- Pretorius, E., Bester, J., Vermeulen, N., Lipinski, B., Gericke, G.S., and Kell, D.B. (2014a). Profound morphological changes in the erythrocytes and fibrin networks of patients with hemochromatosis or with hyperferritinemia, and their normalization by iron chelators and other agents. *PLoS One* 9, e85271.
- Pretorius, E., Du Plooy, J., Soma, P., and Gasparyan, A.Y. (2014b). An ultrastructural analysis of platelets, erythrocytes, white blood cells, and fibrin network in systemic lupus erythematosus. *Rheumatol Int* 34, 1005-1009. doi: 10.1007/s00296-013-2817-x.
- Pretorius, E., and Kell, D.B. (2014). Diagnostic morphology: biophysical indicators for iron-driven inflammatory diseases. *Integrative Biol* 6, 486-510.
- Pretorius, E., Mbotwe, S., Bester, J., Robinson, C., and Kell, D.B. (2016c). Acute induction of anomalous blood clotting by highly substoichiometric levels of bacterial lipopolysaccharide (LPS). *bioRxiv*, 2016-053538v053531. doi: <http://dx.doi.org/10.1101/053538>.
- Pretorius, E., Mbotwe, S., Bester, J., Robinson, C.J., and Kell, D.B. (2016d). Acute induction of anomalous and amyloidogenic blood clotting by molecular amplification of highly substoichiometric levels of bacterial lipopolysaccharide. *J R Soc Interface* 123, 20160539. doi: <http://dx.doi.org/10.1098/rsif.2016.0539>.
- Pretorius, E., Oberholzer, H.M., Van Der Spuy, W.J., Swanepoel, A.C., and Soma, P. (2011a). Qualitative scanning electron microscopy analysis of fibrin networks and platelet abnormalities in diabetes. *Blood Coagul Fibrinol* 22, 463-467. doi: 10.1097/MBC.0b013e3283468a0d.
- Pretorius, E., Oberholzer, H.M., Van Der Spuy, W.J., Swanepoel, A.C., and Soma, P. (2012). Scanning electron microscopy of fibrin networks in rheumatoid arthritis: a qualitative analysis. *Rheumatol Int* 32, 1611-1615. doi: 10.1007/s00296-011-1805-2.
- Pretorius, E., Steyn, H., Engelbrecht, M., Swanepoel, A.C., and Oberholzer, H.M. (2011b). Differences in fibrin fiber diameters in healthy individuals and thromboembolic ischemic stroke patients. *Blood Coagul Fibrinolysis* 22, 696-700. doi: 10.1097/MBC.0b013e32834bdb32.
- Pretorius, E., Swanepoel, A.C., Buys, A.V., Vermeulen, N., Duim, W., and Kell, D.B. (2014c). Eryptosis as a marker of Parkinson's disease. *Aging* 6, 788-819.
- Pretorius, E., Swanepoel, A.C., Oberholzer, H.M., Van Der Spuy, W.J., Duim, W., and Wessels, P.F. (2011c). A descriptive investigation of the ultrastructure of fibrin networks in thromboembolic ischemic stroke. *J Thromb Thrombolysis* 31, 507-513. doi: 10.1007/s11239-010-0538-5.
- Pretorius, E., Vermeulen, N., Bester, J., and Lipinski, B. (2013a). Novel use of scanning electron microscopy for detection of iron-induced morphological changes in human blood. *Microsc Res Tech* 76, 268-271.
- Pretorius, E., Vermeulen, N., Bester, J., Lipinski, B., and Kell, D.B. (2013b). A novel method for assessing the role of iron and its functional chelation in fibrin fibril formation: the use of scanning electron microscopy. *Toxicol Mech Methods* 23, 352-359. doi: 10.3109/15376516.2012.762082.
- Protopopova, A.D., Barinov, N.A., Zavyalova, E.G., Kopylov, A.M., Sergienko, V.I., and Klinov, D.V. (2015). Visualization of fibrinogen alphaC regions and their arrangement during fibrin network formation by high-resolution AFM. *J Thromb Haemost* 13, 570-579. doi: 10.1111/jth.12785.
- Rambaran, R.N., and Serpell, L.C. (2008). Amyloid fibrils: abnormal protein assembly. *Prion* 2, 112-117.

- Riek, R., and Eisenberg, D.S. (2016). The activities of amyloids from a structural perspective. *Nature* 539, 227-235. doi: 10.1038/nature20416.
- Rodríguez-Violante, M., Camacho-Ordoñez, A., Cervantes-Arriaga, A., González-Latapí, P., and Velázquez-Osuna, S. (2015). Factors associated with the quality of life of subjects with Parkinson's disease and burden on their caregivers. *Neurología* 30, 257-263. doi: 10.1016/j.nrl.2014.01.008.
- Rosenbaum, H., Aharon-Peretz, J., and Brenner, B. (2013). Hypercoagulability, parkinsonism, and Gaucher disease. *Semin Thromb Hemost* 39, 928-934. doi: 10.1055/s-0033-1357485.
- Sampson, T.R., Debelius, J.W., Thron, T., Janssen, S., Shastri, G.G., Ilhan, Z.E., Challis, C., Schretter, C.E., Rocha, S., Gradinaru, V., Chesselet, M.-F., Keshavarzian, A., Shannon, K.M., Krajmalnik-Brown, R., Wittung-Stafshede, P., Knight, R., and Mazmanian, S.K. (2016). Gut microbiota regulate motor deficits and neuroinflammation in a model of Parkinson's disease. *Cell* 167, 1469–1480.
- Sato, Y., Kaji, M., Metoki, N., Yoshida, H., and Satoh, K. (2003). Coagulation-fibrinolysis abnormalities in patients receiving antiparkinsonian agents. *J Neurol Sci* 212, 55-58. doi: Doi 10.1016/S0022-510x(03)00101-1.
- Schrag, A., Jahanshahi, M., and Quinn, N. (2000a). How does Parkinson's disease affect quality of life? A comparison with quality of life in the general population. *Mov Disord* 15, 1112-1118.
- Schrag, A., Jahanshahi, M., and Quinn, N. (2000b). What contributes to quality of life in patients with Parkinson's disease? *J Neurol Neurosurg Psychiatry* 69, 308-312.
- Serpell, L.C., Benson, M., Liepnieks, J.J., and Fraser, P.E. (2007). Structural analyses of fibrinogen amyloid fibrils. *Amyloid* 14, 199-203. doi: 10.1080/13506120701461111.
- Stangou, A.J., Banner, N.R., Hendry, B.M., Rela, M., Portmann, B., Wendon, J., Monaghan, M., Mccarthy, P., Buxton-Thomas, M., Mathias, C.J., Liepnieks, J.J., O'grady, J., Heaton, N.D., and Benson, M.D. (2010). Hereditary fibrinogen A alpha-chain amyloidosis: phenotypic characterization of a systemic disease and the role of liver transplantation. *Blood* 115, 2998-3007. doi: 10.1182/blood-2009-06-223792.
- Stocchi, F., Carbone, A., Inghilleri, M., Monge, A., Ruggieri, S., Berardelli, A., and Manfredi, M. (1997). Urodynamic and neurophysiological evaluation in Parkinson's disease and multiple system atrophy. *J Neurol Neurosurg Psychiatry* 62, 507-511.
- Sulatskaya, A.I., Kuznetsova, I.M., and Turoverov, K.K. (2011). Interaction of thioflavin T with amyloid fibrils: stoichiometry and affinity of dye binding, absorption spectra of bound dye. *J Phys Chem B* 115, 11519-11524. doi: 10.1021/jp207118x.
- Tipping, K.W., Van Oosten-Hawle, P., Hewitt, E.W., and Radford, S.E. (2015). Amyloid Fibres: Inert End-Stage Aggregates or Key Players in Disease? *Trends Biochem Sci* 40, 719-727. doi: 10.1016/j.tibs.2015.10.002.
- Tlaskalová-Hogenová, H., Štěpánková, R., Kozáková, H., Hudcovic, T., Vannucci, L., Tučková, L., Rossmann, P., Hrnčir, T., Kverka, M., Zákostelská, Z., Klimešová, K., Přibylková, J., Bártová, J., Sanchez, D., Fundová, P., Borovská, D., Šrůtková, D., Zídek, Z., Schwarzer, M., Drastich, P., and Funda, D.P. (2011). The role of gut microbiota (commensal bacteria) and the mucosal barrier in the pathogenesis of inflammatory and autoimmune diseases and cancer: contribution of germ-free and gnotobiotic animal models of human diseases. *Cell Mol Immunol* 8, 110-120. doi: 10.1038/cmi.2010.67.
- Tycko, R., and Wickner, R.B. (2013). Molecular structures of amyloid and prion fibrils: consensus versus controversy. *Acc Chem Res* 46, 1487-1496. doi: 10.1021/ar300282r.
- Undas, A., and Ariëns, R.a.S. (2011). Fibrin clot structure and function: a role in the pathophysiology of arterial and venous thromboembolic diseases. *Arterioscler Thromb Vasc Biol* 31, e88-99. doi: 10.1161/ATVBAHA.111.230631.
- Uversky, V.N., Li, J., and Fink, A.L. (2001). Metal-triggered structural transformations, aggregation, and fibrillation of human alpha-synuclein. A possible molecular link between Parkinson's disease and heavy metal exposure. *J Biol Chem* 276, 44284-44296.
- Valko, M., Morris, H., and Cronin, M.T.D. (2005). Metals, toxicity and oxidative stress. *Curr Med Chem* 12, 1161-1208.
- Vilar, M., Chou, H.T., Luhrs, T., Maji, S.K., Riek-Loher, D., Verel, R., Manning, G., Stahlberg, H., and Riek, R. (2008). The fold of alpha-synuclein fibrils. *Proc Natl Acad Sci U S A* 105, 8637-8642. doi: 10.1073/pnas.0712179105.

- Weigandt, K.M., White, N., Chung, D., Ellingson, E., Wang, Y., Fu, X.Y., and Pozzo, D.C. (2012). Fibrin clot structure and mechanics associated with specific oxidation of methionine residues in fibrinogen. *Biophys J* 103, 2399-2407. doi: DOI 10.1016/j.bpj.2012.10.036.
- Weinreb, O., Mandel, S., Youdim, M.B.H., and Amit, T. (2013). Targeting dysregulation of brain iron homeostasis in Parkinson disease by iron chelators. *Free Radic Biol Med* 62, 52-64. doi: 10.1016/j.freeradbiomed.2013.01.017.
- Weisel, J.W. (2005). Fibrinogen and fibrin. *Adv Protein Chem* 70, 247-299. doi: 10.1016/S0065-3233(05)70008-5.
- Wolberg, A.S. (2007). Thrombin generation and fibrin clot structure. *Blood Rev* 21, 131-142. doi: 10.1016/j.blre.2006.11.001.
- Wolberg, A.S. (2012). Determinants of fibrin formation, structure, and function. *Curr Opin Hematol* 19, 349-356. doi: 10.1097/MOH.0b013e32835673c2.
- Yermolenko, I.S., Lishko, V.K., Ugarova, T.P., and Magonov, S.N. (2011). High-resolution visualization of fibrinogen molecules and fibrin fibers with atomic force microscopy. *Biomacromolecules* 12, 370-379. doi: 10.1021/bm101122g.
- Zhmurov, A., Brown, A.E., Litvinov, R.I., Dima, R.I., Weisel, J.W., and Barsegov, V. (2011). Mechanism of fibrin(ogen) forced unfolding. *Structure* 19, 1615-1624. doi: 10.1016/j.str.2011.08.013.
- Zhmurov, A., Kononova, O., Litvinov, R.I., Dima, R.I., Barsegov, V., and Weisel, J.W. (2012). Mechanical transition from alpha-helical coiled coils to beta-sheets in fibrin(ogen). *J Am Chem Soc* 134, 20396-20402. doi: 10.1021/ja3076428.
